# Supplementary material for: Deep neural networks for interpreting RNA-binding protein target preferences
Source: HighWire-hosted journal article supplement (doi:10.1101/gr.247494.118), 2020-01-28
Supplement: Supplemental_Table_S2.xlsx [file Supplemental_Table_S2.xlsx]

## Sheet: HepG2_performance
DeepRiPe performance for different RBPs in HepG2 cell-line in terms of AUROC and AP
RBP	roc_auc	average_precision
AGGF1	0.905015	0.703878
AKAP1	0.928116	0.691466
AQR	0.829872	0.330408
BCLAF1	0.943042	0.803638
BUD13	0.806224	0.223923
CDC40	0.811459	0.422071
CSTF2	0.915432	0.513347
CSTF2T	0.978725	0.871417
DDX3X	0.96392	0.842032
DDX55	0.841336	0.380811
DDX59	0.94218	0.747827
DGCR8	0.741653	0.169707
DKC1	0.941908	0.5379
DROSHA	0.852754	0.292076
EFTUD2	0.914646	0.627901
EIF3H	0.822118	0.199867
FAM120A	0.909874	0.590177
FKBP4	0.871419	0.340872
FUBP3	0.979369	0.727375
FXR2	0.913069	0.423122
G3BP1	0.869215	0.440036
GRSF1	0.849837	0.406162
GRWD1	0.854705	0.461547
GTF2F1	0.95566	0.764055
HLTF	0.857954	0.431642
HNRNPC	0.989675	0.855768
HNRNPK	0.984997	0.918885
HNRNPL	0.989638	0.961575
HNRNPM	0.967318	0.746089
IGF2BP1	0.907986	0.581605
IGF2BP3	0.873286	0.342932
ILF3	0.933888	0.635944
KHSRP	0.981976	0.921175
LARP4	0.80117	0.387603
LIN28B	0.828871	0.208309
LSM11	0.760042	0.130748
MATR3	0.964316	0.817777
NCBP2	0.962374	0.719434
NKRF	0.959333	0.580116
NOLC1	0.897418	0.338316
PABPN1	0.879338	0.388983
PCBP2	0.946015	0.818701
PPIG	0.882334	0.583056
PRPF4	0.911163	0.548751
PRPF8	0.921869	0.704034
PTBP1	0.963902	0.882189
QKI	0.987988	0.93037
RBFOX2	0.924311	0.699723
RBM15	0.84408	0.507317
RBM22	0.896082	0.609475
RPS3	0.857618	0.437014
SF3A3	0.901339	0.41138
SF3B4	0.924744	0.640885
SFPQ	0.917017	0.30604
SLTM	0.837339	0.249962
SND1	0.855289	0.328124
SRSF1	0.905275	0.597953
SUB1	0.848241	0.31053
SUGP2	0.950795	0.712502
TIA1	0.912976	0.517237
TIAL1	0.892045	0.321227
U2AF1	0.855244	0.362583
U2AF2	0.912923	0.546188
UCHL5	0.828361	0.135137
UPF1	0.958376	0.853172
XPO5	0.912052	0.579064
XRN2	0.892754	0.502091
YBX3	0.764054	0.114095
ZC3H11A	0.821821	0.262785
ZNF800	0.865791	0.186154

## Sheet: K562_performance
DeepRiPe performance for different RBPs in K562 cell-line in terms of AUROC and AP
RBP	AUROC	average_precision
AATF	0.863002	0.447272
AGGF1	0.915944	0.669588
AKAP1	0.921508	0.559955
AKAP8L	0.901452	0.414334
AQR	0.881242	0.604484
BUD13	0.809534	0.502526
CSTF2T	0.924888	0.579398
DDX24	0.862458	0.638065
DDX3X	0.953363	0.749892
DDX52	0.869171	0.224916
DDX55	0.834813	0.300581
DDX6	0.788556	0.432971
DGCR8	0.773887	0.141985
DHX30	0.812535	0.155665
DROSHA	0.858509	0.391824
EFTUD2	0.890005	0.482115
EIF4G2	0.937426	0.619388
EWSR1	0.960914	0.827556
EXOSC5	0.967745	0.831207
FAM120A	0.899278	0.435339
FMR1	0.838791	0.252795
FUS	0.902845	0.311276
FXR1	0.916979	0.508343
FXR2	0.919662	0.366386
GEMIN5	0.877691	0.396407
GPKOW	0.864721	0.324507
GRWD1	0.925506	0.43319
GTF2F1	0.946335	0.644078
HNRNPK	0.969784	0.739555
HNRNPL	0.959572	0.753572
HNRNPM	0.959796	0.699403
IGF2BP1	0.905012	0.544345
IGF2BP2	0.870576	0.451476
ILF3	0.895172	0.54231
KHDRBS1	0.996404	0.969223
KHSRP	0.97897	0.910171
LIN28B	0.841216	0.265525
LSM11	0.800185	0.244813
MATR3	0.982178	0.857459
METAP2	0.854503	0.289824
MTPAP	0.785088	0.164228
NOLC1	0.78969	0.331332
NONO	0.948525	0.617878
PABPC4	0.842263	0.354541
PCBP1	0.92607	0.494656
PRPF8	0.830646	0.321647
PTBP1	0.990057	0.978751
PUM1	0.830311	0.27977
PUM2	0.96987	0.807182
QKI	0.983966	0.933121
RBFOX2	0.875362	0.428899
RBM15	0.912509	0.788555
RBM22	0.947729	0.561852
RPS3	0.816231	0.180607
SAFB2	0.967436	0.793508
SF3B4	0.888507	0.465083
SLTM	0.888107	0.413286
SMNDC1	0.821484	0.203285
SND1	0.894059	0.266862
SRSF1	0.874361	0.255501
TARDBP	0.986362	0.881148
TIA1	0.871805	0.389558
TRA2A	0.964906	0.79732
U2AF1	0.917576	0.539919
U2AF2	0.936242	0.614886
UCHL5	0.895689	0.593439
UPF1	0.950237	0.764039
XRN2	0.899037	0.48922
YBX3	0.864844	0.470086
ZC3H11A	0.853612	0.356374
ZNF622	0.896062	0.488676
ZNF800	0.898001	0.37902
